# Supplementary material for: Functional anatomy of the immunoglobulin heavy chain 3΄ super-enhancer needs not only core enhancer elements but also their unique DNA context
Source: PubMed Central journal article supplement — Nucleic Acids Res. 2017 Mar 22;45(10):5829–37. doi: 10.1093/nar/gkx203 (PMC5449612; doi:10.1093/nar/gkx203), 2017-03-22
Supplement: gkx203_Supp.pdf [file gkx203_Supp.pdf]

A

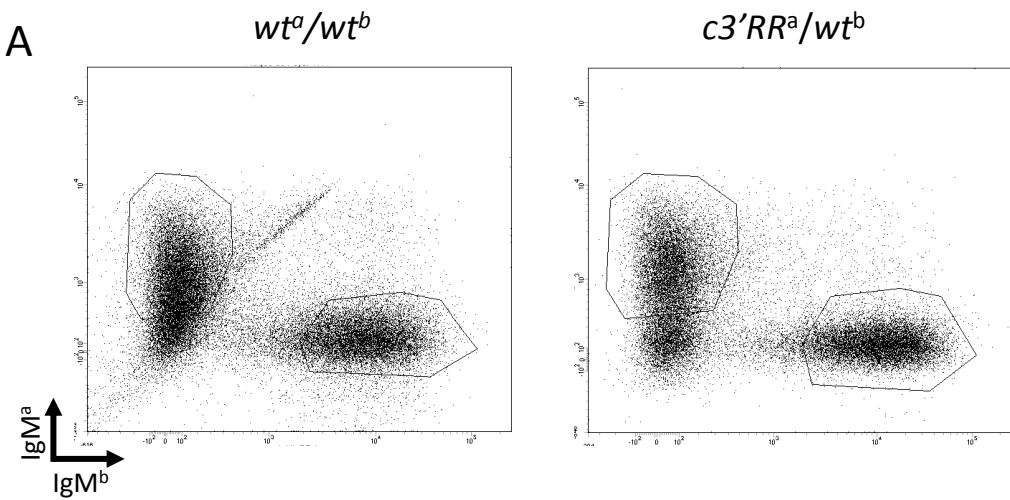

B

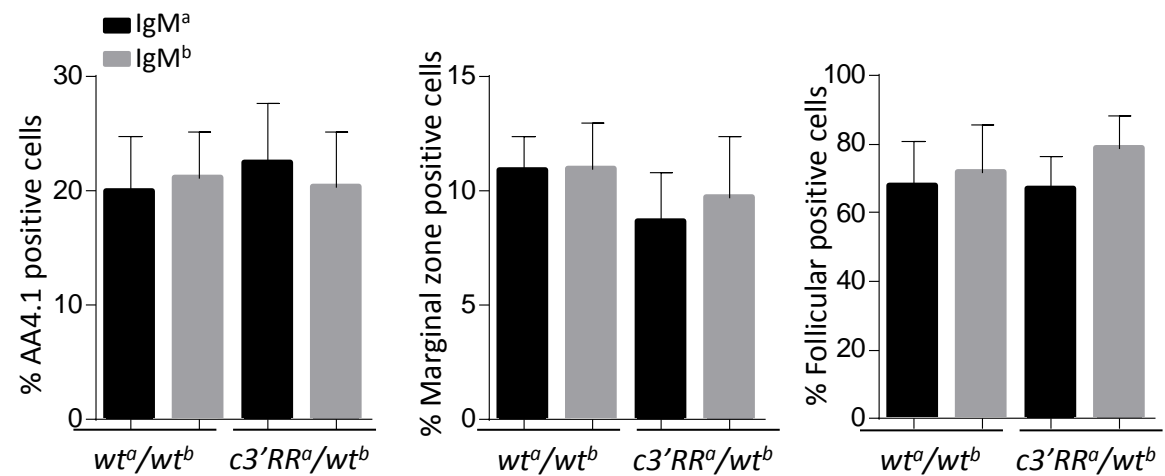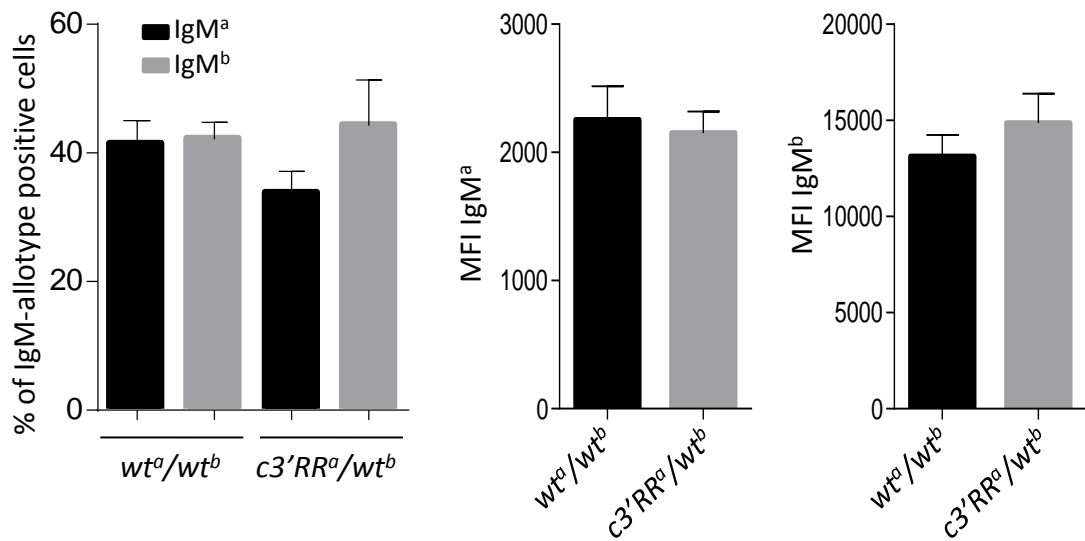

A

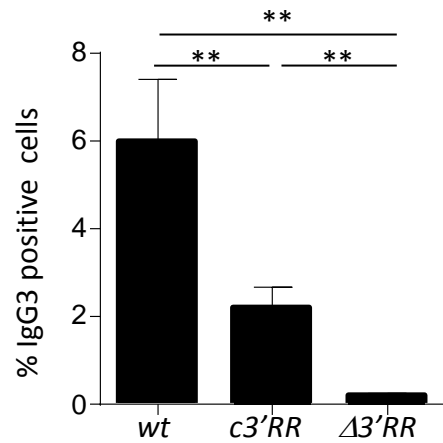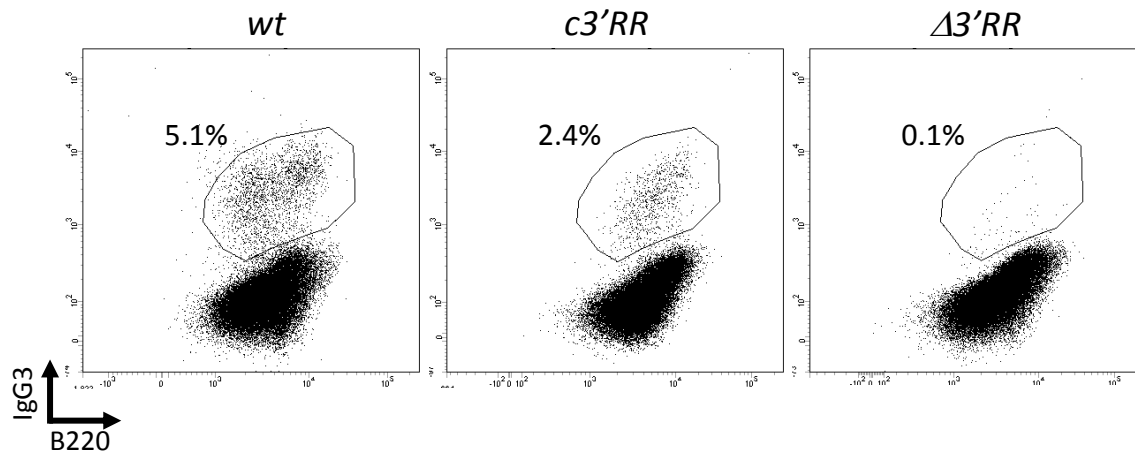

B

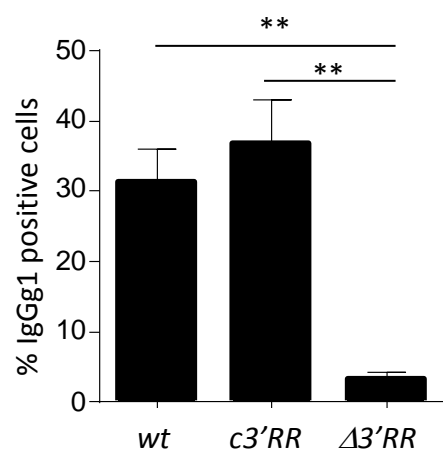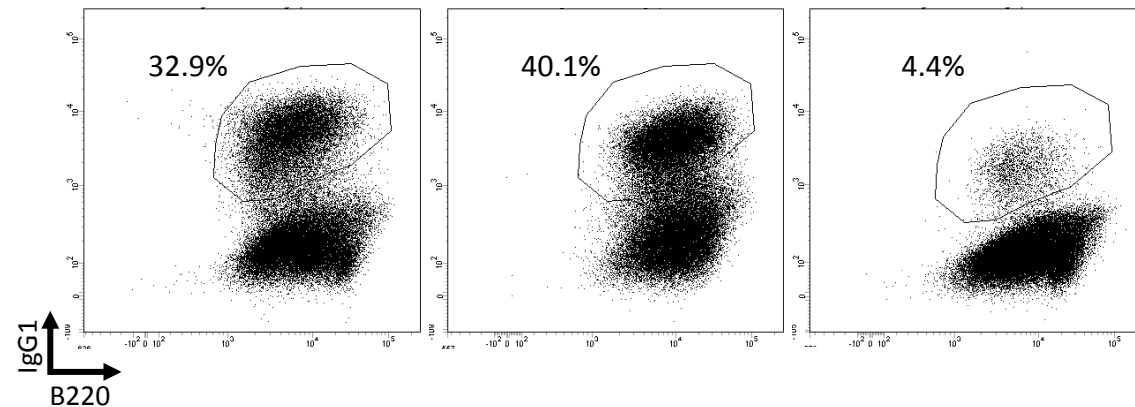

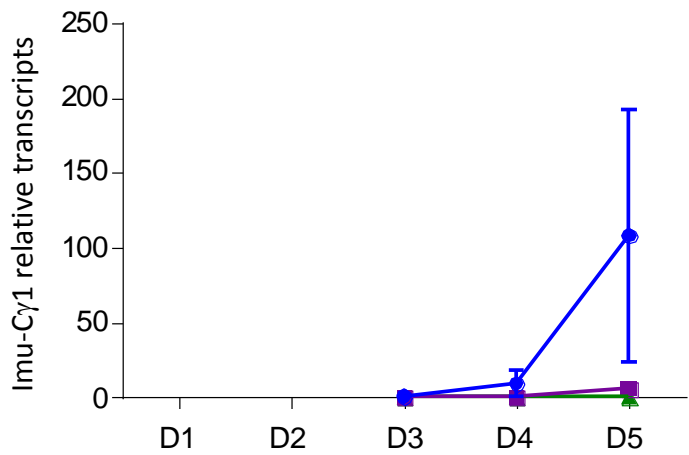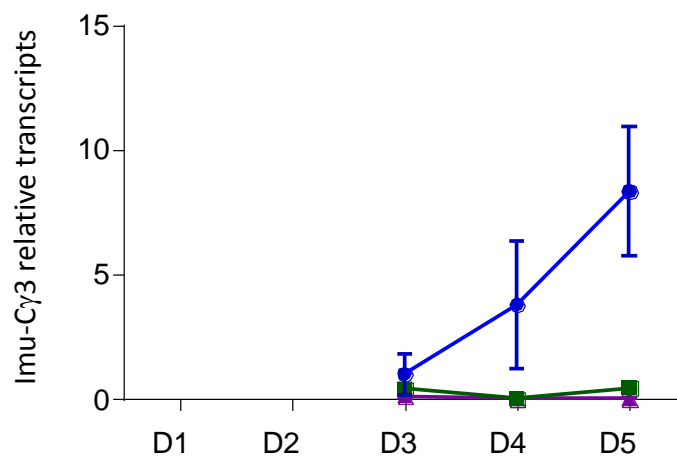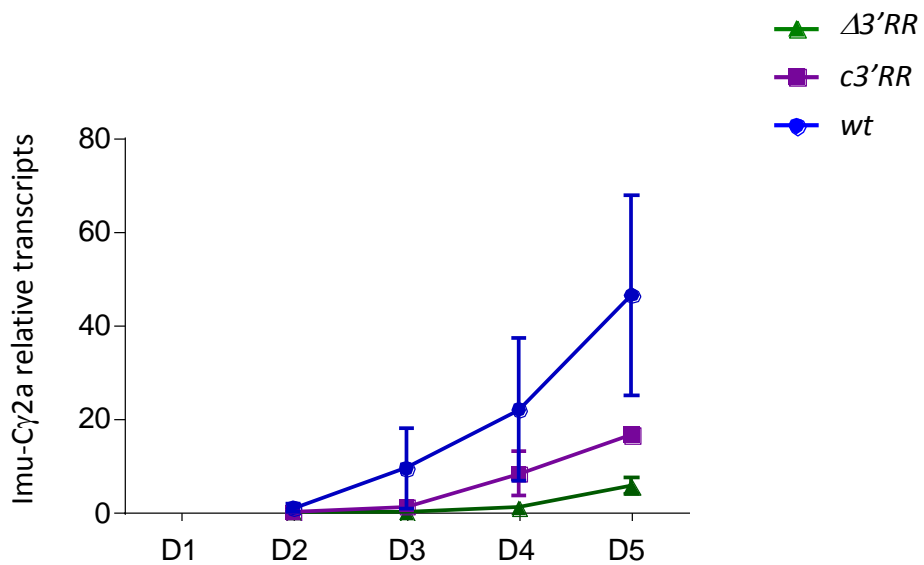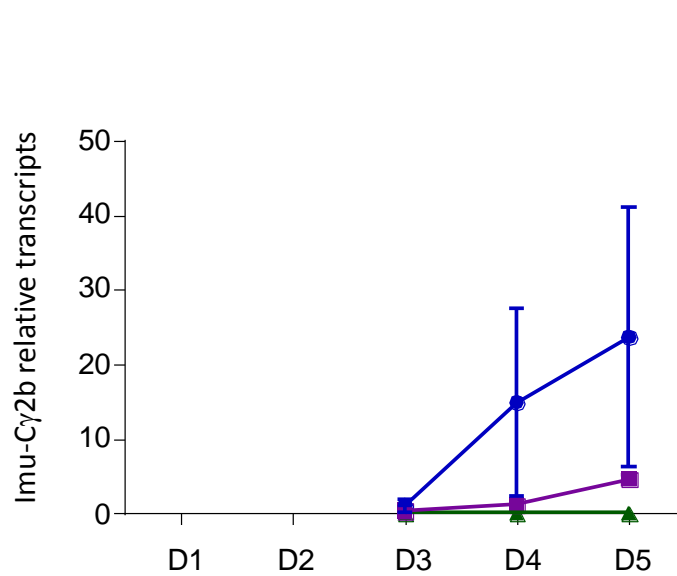

## 3'JH4 mutations

wt

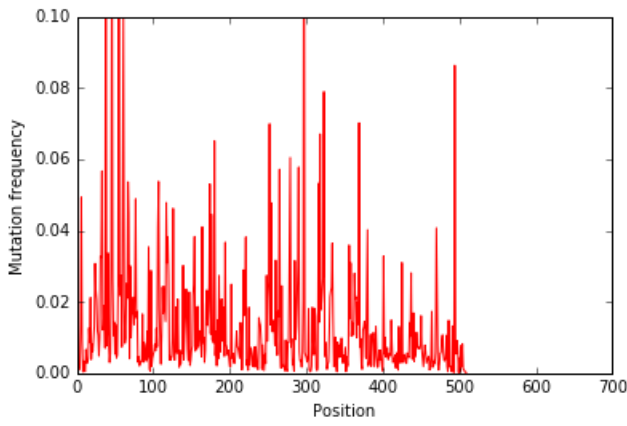

Mutation rate: 12.85 /1000 bases  
Mutations: 2 095 296  
Aligned bases: 162 999 878

|   | A  | T  | C | G  | Tot |
|---|----|----|---|----|-----|
| A | 0  | 11 | 9 | 15 | 35  |
| T | 6  | 0  | 8 | 5  | 19  |
| C | 5  | 13 | 0 | 8  | 26  |
| G | 11 | 5  | 4 | 0  | 20  |

c3'RR

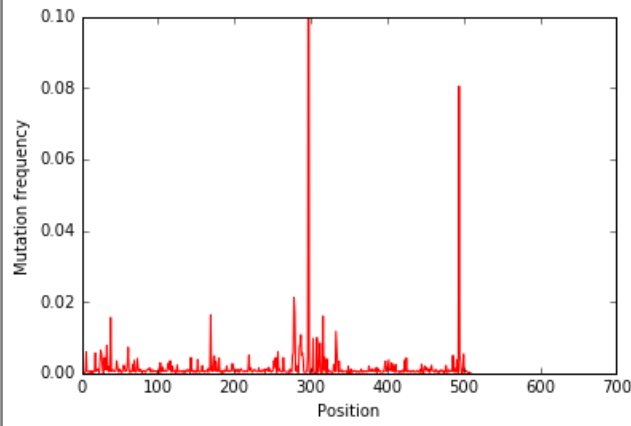

Mutation rate: 1.27 /1000 bases  
Mutations: 96 919  
Aligned bases: 76 426 949

|   | A  | T  | C | G  | Tot |
|---|----|----|---|----|-----|
| A | 0  | 10 | 4 | 15 | 29  |
| T | 11 | 0  | 8 | 6  | 25  |
| C | 6  | 12 | 0 | 4  | 22  |
| G | 14 | 7  | 3 | 0  | 24  |

$\Delta$ 3'RR

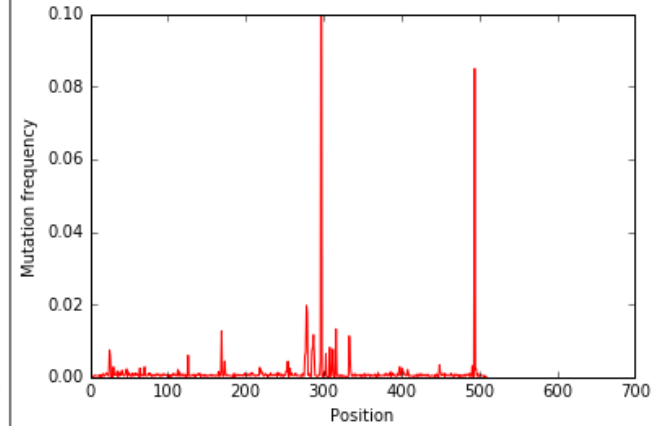

Mutation rate: 0.94 /1000 bases  
Mutations: 171 902  
Aligned bases: 182 651 508

|   | A  | T  | C | G  | Tot |
|---|----|----|---|----|-----|
| A | 0  | 8  | 6 | 15 | 29  |
| T | 11 | 0  | 9 | 7  | 27  |
| C | 6  | 12 | 0 | 3  | 21  |
| G | 13 | 8  | 3 | 0  | 24  |

## 3'Jk5 mutations

wt

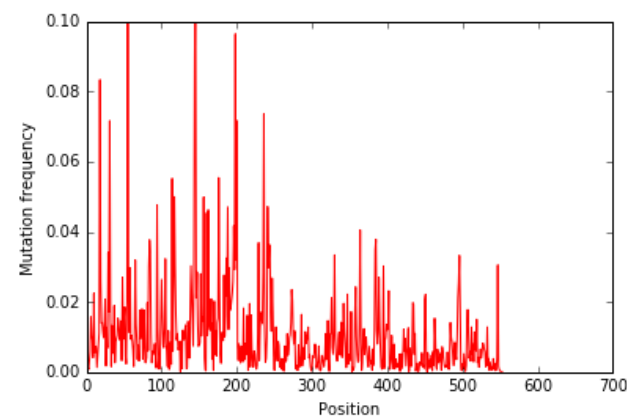

Mutation rate: 11.02 /1000 bases  
Mutations: 87 546  
Aligned bases: 7 941 973

|   | A  | T  | C | G  | Tot |
|---|----|----|---|----|-----|
| A | 0  | 7  | 8 | 15 | 30  |
| T | 7  | 0  | 9 | 6  | 22  |
| C | 5  | 13 | 0 | 7  | 25  |
| G | 12 | 4  | 6 | 0  | 22  |

c3'RR

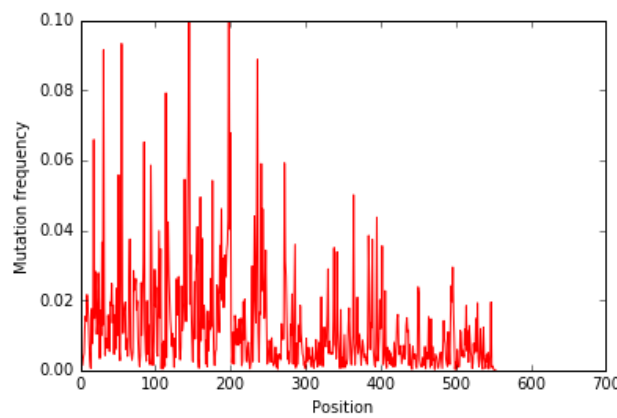

Mutation rate: 13.42 /1000 bases  
Mutations: 1 530 524  
Aligned bases: 114 047 327

|   | A  | T  | C  | G  | Tot |
|---|----|----|----|----|-----|
| A | 0  | 8  | 6  | 16 | 30  |
| T | 8  | 0  | 11 | 5  | 24  |
| C | 5  | 16 | 0  | 7  | 28  |
| G | 11 | 3  | 5  | 0  | 19  |

$\Delta$ 3'RR

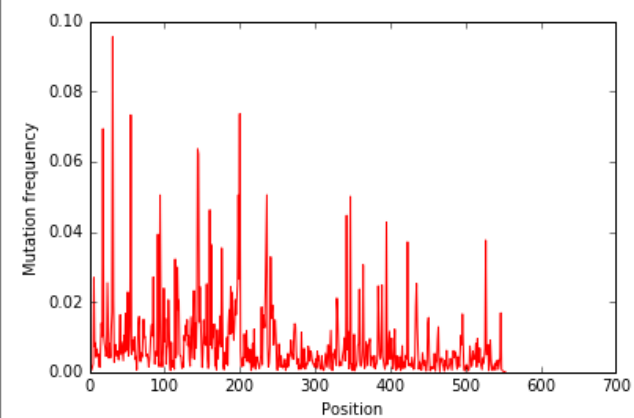

Mutation rate: 8.25 /1000 bases  
Mutations: 5 596 862  
Aligned bases: 678 247 884

|   | A  | T  | C  | G  | Tot |
|---|----|----|----|----|-----|
| A | 0  | 9  | 6  | 16 | 31  |
| T | 7  | 0  | 10 | 4  | 21  |
| C | 4  | 13 | 0  | 8  | 25  |
| G | 11 | 4  | 7  | 0  | 22  |

### Figure S1: B-cell development

(A) Representative dot plot of IgM<sup>a</sup> and IgM<sup>b</sup> expression in *wt* and *c3'RR* mice (*top*). Bar graph representing the percentage of IgM<sup>a</sup> and IgM<sup>b</sup> positive cells [gated on B220 positive cells] in *wt<sup>a</sup>/wt<sup>b</sup>* and *c3'RR<sup>a</sup>/wt<sup>b</sup>* mice (*bottom left*). Mean  $\pm$  SEM of membrane IgM<sup>a</sup> and IgM<sup>b</sup> densities in *wt<sup>a</sup>/wt<sup>b</sup>* and  *$\mu$ 3'RR<sup>a</sup>/wt<sup>b</sup>* mice (*bottom right*). (B) Flow cytometry analysis of transitional (AA4.1<sup>+</sup>), follicular (CD21<sup>low</sup>CD23<sup>high</sup>) and marginal zone (CD21<sup>high</sup>CD23<sup>low</sup>) B-cells in *wt<sup>a</sup>/wt<sup>b</sup>* and *c3'RR<sup>a</sup>/wt<sup>b</sup>* mice. These experiments were performed on splenic cells from 2 month old mice.

### Figure S2: CSR analysis

(A) IgG3 positive B-cells after 4-days LPS *in vitro* stimulation of splenocytes from *wt*, *c3'RR* and  $\Delta$ 3'RR mice, analysed by flow cytometry (*left*). Right panel shows one representative experiment. (B) As in (A) for LPS + IL4 *in vitro* stimulation. Mean  $\pm$  SEM of 2 independent experiments, with 3 mice each.

### Figure S3: Post Switch transcripts

Day1 to 5 kinetics of post-switch transcripts, in LPS +/- cytokines *in vitro* stimulated splenocytes from  $\Delta$ 3'RR, *c3'RR* and *wt* mice. Mean  $\pm$  SEM of an experiment with 2 mice.

### Figure S4: Positions and patterns of SHM

Positions and patterns of mutations in the introns flanking rearranged J<sub>H</sub>4 and J <sub>$\kappa$</sub> 5 segments, in *wt* compared to *c3'RR* and  $\Delta$ 3'RR Peyer's patch GC B-cells. Mutation rate, total number of mutations identified, and total number of aligned bases are indicated. Data are shown for one representative mouse of each genotype.

| Primers                  | Sequence 5' - 3'                        | Use                      |
|--------------------------|-----------------------------------------|--------------------------|
| 5' Arm 1                 | AAG GAG GCA TAG AAG CAG A               | ES cells Screening       |
| 5' Arm 2                 | AGA AGA ACT CGT CAA GA                  | ES cells Screening       |
| 3' Arm 1                 | AAA GTA TCG TTA GGC CCT AGG             | ES cells Screening       |
| 3' Arm 2                 | GTG CAA TCC ATC TTG TTC AAT GGC CGA TCC | ES cells Screening       |
| Screen For wt allele     | AGG GAC TGA AGT CCAT CCA TAG            | mice screening           |
| Screen rev wt allele     | CAG AGC AGA GAA GAC TCC ATC C           | mice screening           |
| Screen For mutant allele | ACT CAT TCT AAT AAC TGG TCC C           | mice screening           |
| Screen rev mutant allele | CTC TCA CTT CCC TGG GGT GTT             | mice screening           |
| CRISP 5' for             | CAC CGG GCC ATG ATA CTG GTC ACT         | CRISPR/cas 9 primer      |
| CRISP 5' rev             | TTT AGT GAC CAG TAT CAT GGC CC          | CRISPR/cas 9 primer      |
| CRISP 3' for             | CAC CGC CAC AAG CAC CGG CTG CCA         | CRISPR/cas 9 primer      |
| CRISP 3' rev             | TTT GTG GCA GCC GGT GCT TGT GGC         | CRISPR/cas 9 primer      |
| 5'Arm For AAtII          | TTT GAC GTC AAC GTC AAG AGC CAC TTT CC  | μKIKS locus construction |
| 5' Arm Rev ClaI          | TTT ATC GAT GAC CAG TAT CAT GGC CCA GT  | μKIKS locus construction |
| Imu-CG3-Fwd Imu2         | CTC GGT GGC TTT GAA GGA AC              | PST primers              |
| Imu-Cmu-Fwd              | ACC TGG GAA TGT ATG GTT GTG GCT T       | PST primers              |
| Imu-CG1-Rev              | ATG GAG TTA GTT TGG GCA GCA             | PST primers              |
| Imu-CG2b-Rev             | CGG AGG AAC CAG TTG TAT C               | PST primers              |
| Imu-CG2a-Rev             | GCT GGG CCA GGT GCT CGA GGT T           | PST primers              |
| Imu-CG3-Rev              | ACC AAG GGA TAG ACA GAT GGG G           | PST primers              |
| PST Imu-CA Fw            | ACC TGG GAA TGT ATG GTT GTG GCT T       | PST primers              |
| PST Imu-CA Rev           | TAA TCG TGA ATC AGG CAG                 | PST primers              |
| IG3-CG3-Fwd              | AAC TAC TGC TAC CAC CAC CAC CAG         | GLT primers              |
| IG3-CG3-Rev              | ACC AAG GGA TAG ACA GAT GGG G           | GLT primers              |
| IG1-CG1-Fwd              | GGC CCT TCC AGA TCT TTG AG              | GLT primers              |
| IG1-CG1-Rev              | ATG GAG TTA GTT TGG GCA GCA             | GLT primers              |
| IG2b-Fwd                 | CCA ACC AGG AAG AGT CCA GAG             | GLT primers              |
| CG2b-Rev                 | ACA GGG ATC CAG AGT TCC AAG T           | GLT primers              |
| IG2a-CG2a-Fwd            | GCT GAT GTA CCT ACC GAG AGA             | GLT primers              |
| IG2a-CG2a-Rev            | GCT GGG CCA GGT GCT CGA GGT T           | GLT primers              |
| GLT IA-CA Fw             | CTA CCA TAG GGA AGA TAG CCT             | GLT primers              |
| GLT IA-CA Rev            | TAA TCG TGA ATC AGG CAG                 | GLT primers              |
| slgM for                 | TGG AAC TCC GGA GAG ACC TA              | secreted IgM transcripts |
| slgM rev                 | CGC TAG CAT GGT CAA TAG CA              | secreted IgM transcripts |
| VHJ558 SHM               | CAG CCT GAC ATC TGA GGA CTC TGC         | SHM analysis             |
| SHM JH4 3'               | CAG CAA CTA CCC TTT TGA GAC CGA         | SHM Analysis             |

Supplementary Table S1 : Name and sequence of the primers used in this study
